# Supplementary material for: Thought disorder measured as random speech structure classifies negative symptoms and schizophrenia diagnosis 6 months in advance
Source: PubMed Central journal article supplement (PMC5441540; doi:10.1038/s41537-017-0019-3), 2017-04-13
Supplement: 41537_2017_19_MOESM3_ESM.pdf [file 41537_2017_19_MOESM3_ESM.pdf]

**Supplementary Table 3:** Spearman correlation between connectedness attributes (E, LCC, LSC, LCCz, LSCz) and negative symptoms measured by PANSS (total negative subscale, N1, N2, N3, N4, N5, N6, N7), using dreams or negative image reports. Showed R, and p values (significant results in bold after Bonferroni correction for 80 comparisons – 5 attributes \* 2 reports \* 8 symptoms,  $p < 0.0006$ ).

| Dream Reports           | E     |               | LCC   |               | LSC   |               | LCCz  |               | LSCz  |               |
|-------------------------|-------|---------------|-------|---------------|-------|---------------|-------|---------------|-------|---------------|
| PANSS Negative Subscale | Rho   | p             | Rho   | p             | Rho   | p             | Rho   | p             | Rho   | p             |
| Total                   | -0.69 | 0.0046        | -0.69 | 0.0042        | -0.65 | 0.0089        | -0.41 | 0.132         | -0.16 | 0.5654        |
| N1                      | -0.71 | 0.0028        | -0.71 | 0.0031        | -0.72 | 0.0026        | -0.34 | 0.2121        | -0.23 | 0.4098        |
| N2                      | -0.85 | <b>0.0001</b> | -0.8  | <b>0.0003</b> | -0.76 | 0.0009        | -0.39 | 0.1463        | -0.2  | 0.4775        |
| N3                      | -0.57 | 0.0279        | -0.57 | 0.0279        | -0.56 | 0.0286        | -0.25 | 0.3755        | -0.11 | 0.6962        |
| N4                      | -0.56 | 0.0317        | -0.48 | 0.0724        | -0.4  | 0.1392        | -0.11 | 0.6852        | 0.33  | 0.2355        |
| N5                      | -0.44 | 0.0978        | -0.49 | 0.0634        | -0.47 | 0.0757        | -0.39 | 0.1459        | -0.46 | 0.0836        |
| N6                      | -0.6  | 0.0192        | -0.6  | 0.0183        | -0.57 | 0.0281        | -0.44 | 0.0988        | -0.2  | 0.4774        |
| N7                      | 0.63  | 0.0126        | 0.64  | 0.0101        | 0.6   | 0.0184        | 0.28  | 0.3200        | 0.33  | 0.2342        |
| Negative Image Reports  | E     |               | LCC   |               | LSC   |               | LCCz  |               | LSCz  |               |
| PANSS Negative Subscale | Rho   | p             | Rho   | p             | Rho   | p             | Rho   | p             | Rho   | p             |
| Total                   | -0.81 | <b>0.0000</b> | -0.85 | <b>0.0000</b> | -0.81 | <b>0.0000</b> | -0.7  | <b>0.0005</b> | -0.77 | <b>0.0001</b> |
| N1                      | -0.78 | <b>0.0000</b> | -0.8  | <b>0.0000</b> | -0.77 | <b>0.0000</b> | -0.63 | 0.0021        | -0.69 | <b>0.0006</b> |
| N2                      | -0.77 | <b>0.0000</b> | -0.77 | <b>0.0001</b> | -0.75 | <b>0.0001</b> | -0.62 | 0.0027        | -0.67 | 0.0008        |
| N3                      | -0.8  | <b>0.0000</b> | -0.77 | <b>0.0000</b> | -0.82 | <b>0.0000</b> | -0.59 | 0.0051        | -0.75 | <b>0.0001</b> |
| N4                      | -0.69 | <b>0.0006</b> | -0.73 | <b>0.0002</b> | -0.62 | 0.0026        | -0.69 | <b>0.0005</b> | -0.57 | 0.0065        |
| N5                      | -0.63 | 0.0024        | -0.66 | 0.0011        | -0.66 | 0.0012        | -0.46 | 0.0364        | -0.67 | 0.0008        |
| N6                      | -0.8  | <b>0.0000</b> | -0.81 | <b>0.0000</b> | -0.81 | <b>0.0000</b> | -0.57 | 0.0065        | -0.73 | <b>0.0002</b> |
| N7                      | 0.32  | 0.1562        | 0.26  | 0.2543        | 0.24  | 0.2998        | -0.02 | 0.9409        | 0.05  | 0.8288        |
