# Supplementary material for: Thought disorder measured as random speech structure classifies negative symptoms and schizophrenia diagnosis 6 months in advance
Source: PubMed Central journal article supplement (PMC5441540; doi:10.1038/s41537-017-0019-3), 2017-04-13
Supplement: 41537_2017_19_MOESM9_ESM.pdf [file 41537_2017_19_MOESM9_ESM.pdf]

**Supplementary Table 9:** Demographic data and indices from recent-onset psychosis sample.

| NoID Subjects | Group            | Demographic/Medication |     |           |     | Dirtsorganization Index |       |          |
|---------------|------------------|------------------------|-----|-----------|-----|-------------------------|-------|----------|
|               |                  | APDose                 | Age | Education | Sex | Dream+Negative          | Dream | Negative |
| Subject 01    | Schizophrenia    | 414                    | 16  | 8         | m   | 24.13                   | 20.68 | 25.17    |
| Subject 02    | Schizophrenia    | 157                    | 18  | 9         | m   | 18.32                   | 25.87 | 15.12    |
| Subject 04    | Schizophrenia    | 132                    | 18  | 6         | m   | 14.36                   | 16.29 | 17.71    |
| Subject 05    | Schizophrenia    | 7                      | 9   | 3         | m   | 23.41                   | 21.78 | 20.64    |
| Subject 07    | Schizophrenia    | 91                     | 15  | 6         | m   |                         |       | 31.23    |
| Subject 08    | Schizophrenia    | 289                    | 13  | 4         | m   | 28.26                   | 21.80 | 30.41    |
| Subject 09    | Schizophrenia    | 50                     | 15  | 8         | m   | 28.93                   | 23.15 | 30.58    |
| Subject 10    | Schizophrenia    | 100                    | 16  | 7         | m   |                         |       | 18.71    |
| Subject 11    | Schizophrenia    | 264                    | 12  | 4         | m   |                         |       | 25.05    |
| Subject 03    | Schizophrenia    | 100                    | 16  | 7         | f   |                         |       | 20.46    |
| Subject 06    | Schizophrenia    | 264                    | 13  | 1         | f   | 29.54                   | 24.90 | 31.42    |
| Subject 12    | Bipolar Disorder | 0                      | 7   | 2         | m   | 12.49                   | 14.75 | 14.46    |
| Subject 15    | Bipolar Disorder | 289                    | 17  | 10        | m   | 13.50                   | 22.20 | 12.84    |
| Subject 17    | Bipolar Disorder | 100                    | 16  | 6         | m   | 12.02                   | 13.74 | 11.76    |
| Subject 13    | Bipolar Disorder | 132                    | 16  | 1         | f   |                         |       | 30.89    |
| Subject 14    | Bipolar Disorder | 248                    | 14  | 9         | f   | 13.38                   | 10.03 | 11.92    |
| Subject 16    | Bipolar Disorder | 330                    | 15  | 1         | f   |                         |       | 29.23    |
| Subject 18    | Bipolar Disorder | 25                     | 15  | 6         | f   | 12.18                   | 15.40 | 14.54    |
| Subject 19    | Bipolar Disorder | 0                      | 13  | 7         | f   | 7.80                    | 11.98 | 11.62    |
| Subject 20    | Bipolar Disorder | 0                      | 23  | 12        | f   | 12.45                   | 13.42 | 15.41    |
| Subject 21    | Bipolar Disorder | 66                     | 17  | 10        | f   | 16.25                   | 11.02 | 20.82    |
| Subject 23    | Control          |                        | 14  | 9         | m   | 8.61                    | 9.37  | 10.42    |
| Subject 24    | Control          |                        | 19  | 11        | m   | 0.51                    | 6.32  | 8.39     |
| Subject 25    | Control          |                        | 16  | 9         | m   | 11.52                   | 16.09 | 12.85    |
| Subject 26    | Control          |                        | 8   | 2         | m   | 20.30                   | 18.86 | 23.65    |
| Subject 28    | Control          |                        | 13  | 6         | m   | 20.28                   | 21.51 | 19.22    |
| Subject 29    | Control          |                        | 8   | 2         | m   | 18.77                   | 22.87 | 15.82    |
| Subject 31    | Control          |                        | 14  | 9         | m   | 17.33                   | 14.85 | 19.37    |
| Subject 33    | Control          |                        | 15  | 6         | m   | 13.80                   | 19.62 | 14.56    |
| Subject 35    | Control          |                        | 17  | 7         | m   | 18.42                   | 16.85 | 22.75    |
| Subject 38    | Control          |                        | 16  | 7         | m   | 21.02                   | 9.47  | 30.08    |
| Subject 39    | Control          |                        | 21  | 12        | m   | 9.10                    | 8.33  | 12.95    |
| Subject 40    | Control          |                        | 15  | 9         | m   | 11.43                   | 13.44 | 12.75    |
| Subject 22    | Control          |                        | 18  | 11        | f   | 5.25                    | 7.66  | 7.58     |
| Subject 27    | Control          |                        | 13  | 7         | f   | 7.09                    | 9.67  | 11.88    |
| Subject 30    | Control          |                        | 23  | 12        | f   | 5.74                    | 10.69 | 9.05     |
| Subject 32    | Control          |                        | 15  | 8         | f   | 11.25                   | 14.76 | 13.02    |
| Subject 34    | Control          |                        | 13  | 7         | f   | 21.92                   | 24.25 | 18.25    |
| Subject 36    | Control          |                        | 14  | 6         | f   | 20.32                   | 24.57 | 19.82    |
| Subject 37    | Control          |                        | 19  | 11        | f   | 3.40                    | 11.70 | 8.12     |
| Subject 41    | Control          |                        | 15  | 7         | f   | 17.61                   | 14.75 | 19.39    |
| Subject 42    | Control          |                        | 18  | 11        | f   | 15.07                   | 14.71 | 17.72    |
